# Supplementary material for: Micro/nano-structured polyaniline/silver catalyzed borohydride reduction of 4-nitrophenol
Source: Royal Society of Chemistry journal article supplement (doi:10.1039/c5ra05396j), 2015-01-01
Supplement: c5ra05396j1.pdf [file c5ra05396j1.pdf]

## Supplementary information

### 1. X-ray diffraction patterns of PANI

The powder X-ray diffraction patterns (PXRD) were performed on a Rigaku SmartLab 9kW ray diffractometer at room temperature, in parallel beam geometry employing Cu K $\alpha$  lines focused radiation (1.54059 Å, 1.54439 Å) at 9kW (45Kv, 200mA) power.

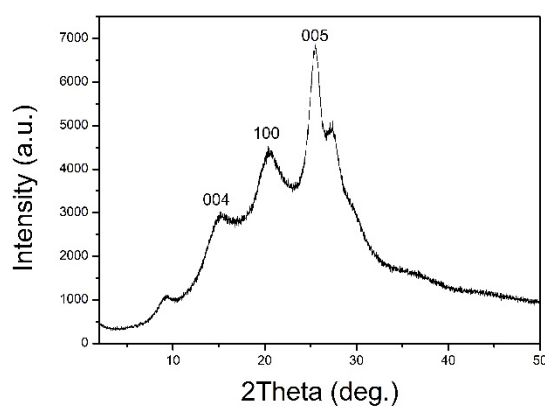

Fig. S1 X-ray diffraction patterns of PANI

### 2. Calculation of the estimated crystal size of PANI/Ag by Scherrer equation

The relation between grain size and half-peak width of XRD peaks is given by Scherrer equation:

$$d = K\lambda / (B \cos\theta)$$

In the equation,  $\lambda$  is the wavelength ( $\lambda = 1.54060$  Å for Cu K $\alpha$ 1),  $\theta$  is the diffraction angle,  $B$  is the width at half height of the peak around  $\theta$ ,  $K$  is the correction factor ( $K = 0.89$ ). The size of every crystal face, as calculated according to benchmark of standard silver peaks, was 67.2, 58.1, 57.5, and 54.4 nm, respectively. And the average crystal size is 59.3nm, which is consistent with the result of TEM image (Fig.4 (e) (f)).

### 3. Particle size distribution of PANI micro-spheres and PANI micro-rods

The particle size distribution of PANI with different morphology is illustrated in Fig.4, which suggests that the PANI particles are normally distributed of a few microns, consistent with the SEM images of PANI particles.

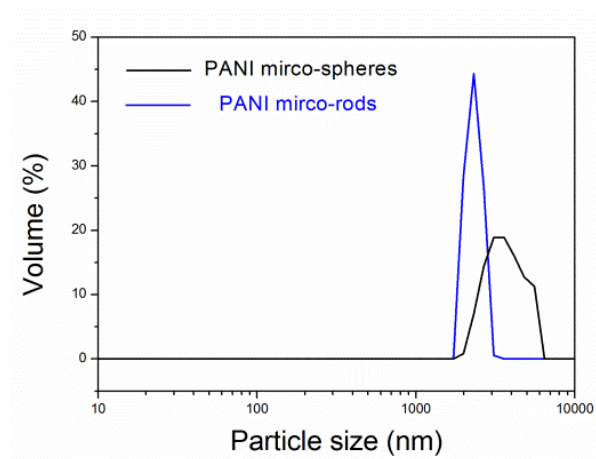

Fig. S2. Particle size distribution of PANI micro-spheres and PANI micro-rods

### 4. The derivation process of rate constant

For the initial concentration of  $\text{NaBH}_4$  greatly exceeded that of 4-nitrophenol, so it was assumed that the concentration of  $\text{NaBH}_4$  remained constant during the reaction. In other words, the reduction of 4-nitrophenol can be considered as pseudo-first-order reaction. So, there exists a linear correlation between  $\ln(A_t)$  and the reaction time, which is shown in Fig.7.  $\ln(A_t)$  represents the natural logarithm of absorption value at a time. The reaction rate follows first order kinetics, which can be illustrated in Eq. (1)

$$-\frac{dc}{dt} = kc \quad (1)$$

The apparent rate constant in the reduction of 4-nitrophenol was calculated by

the following equations:

$$\frac{-dc}{c} = kt \quad (2)$$

$$-\int_{c_0}^{c_t} \frac{dc}{c} = \int_0^t k dt \quad (3)$$

$$-\ln\left(\frac{c_t}{c_0}\right) = kt \quad (4)$$

Under a certain wavelength

$$A = ac \quad (5)$$

$$k = \frac{\ln\left(\frac{A_0}{A_t}\right)}{t} = \frac{(\ln A_0 - \ln A_t)}{t} \quad (6)$$

Where  $t$  represents time,  $k$  represents the apparent rate constant,  $c_0$  represents the initial concentration of 4-nitrophenol,  $c_t$  represents the concentration of 4-nitrophenol, which changes over time,  $A_0$  is the initial absorbance of 4-nitrophenol,  $A$  is the absorbance of 4-nitrophenol, which changes over time,  $a$  is the proportionality constant.
